# Supplementary material for: A portable smartphone platform based on fluorescent carbon quantum dots derived from biowaste for on-site detection of permanganate
Source: Royal Society of Chemistry journal article supplement (doi:10.1039/d4nj01987c), 2024-01-01
Supplement: d4nj01987c1.pdf [file d4nj01987c1.pdf]

## Electronic Supplementary Information

### **Portable smartphone platform based on fluorescent carbon quantum dots derived from biowaste for on-site detection of permanganate**

Li Xu<sup>a</sup>, Chenfei Zhu<sup>a</sup>, Xiaogang Duan<sup>b</sup>, Lei Bao<sup>a</sup>, Guanglin Wang<sup>a</sup>, Wei Fu<sup>a,\*</sup>

<sup>a</sup> *Key Laboratory of Biomimetic Sensor and Detecting Technology of Anhui Province, West Anhui University, Lu'an 237012, PR China.*

<sup>b</sup> *Sichuan Yalian Hydrogen Technology Co., Ltd, Chengdu 610000, PR China.*

\* Corresponding author.

*E-mail address: w-fu17@tsinghua.org.cn*

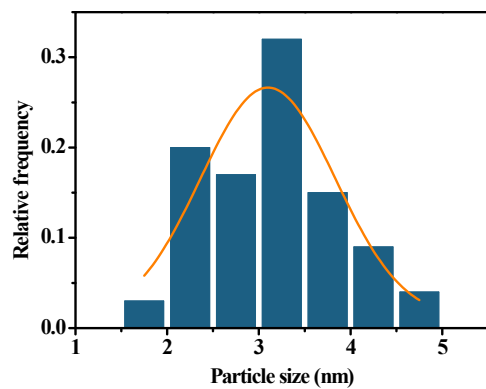

**Fig. S1** Size distribution of CQDs (Average diameter= $3.14 \pm 0.71$  nm)

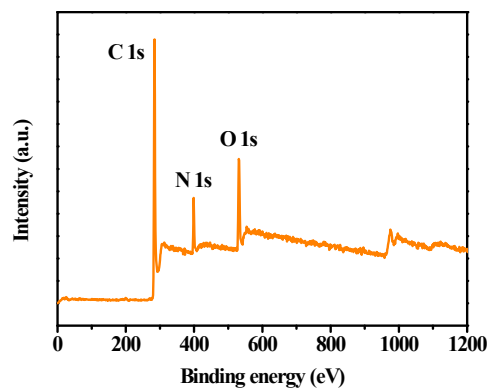

Fig. S2 XPS survey scan of CQDs

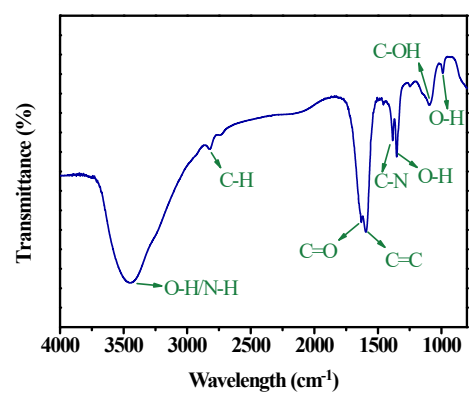

Fig. S3 FT-IR spectrum of CQDs.

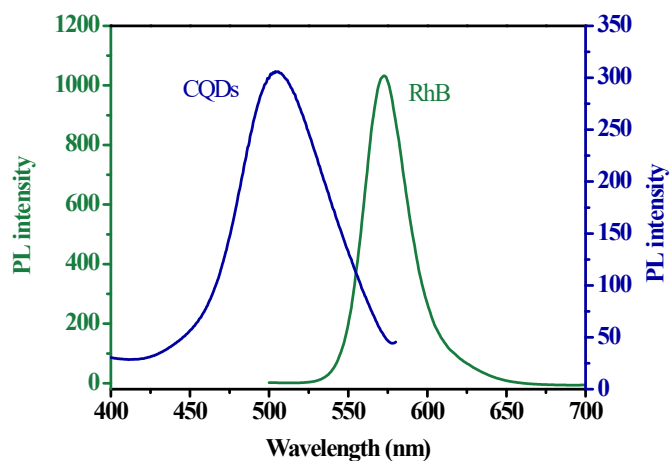

Fig. S4 PL spectrum of CQDs and Rhodamine B

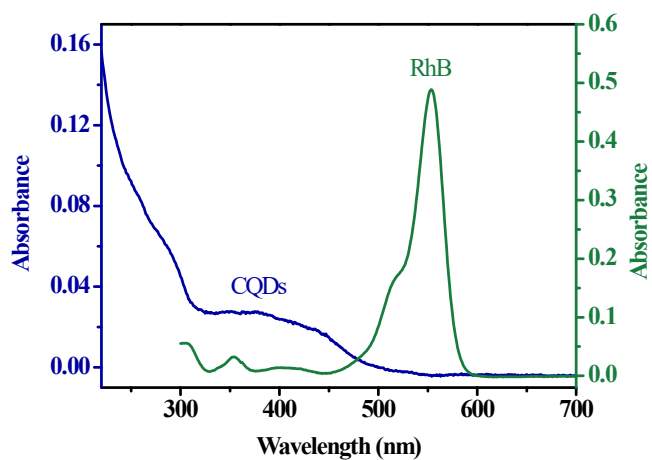

Fig. S5 UV-vis spectrum of CQDs and Rhodamine B (RhB)

Table S1. Quantum yield of the CQDs.

| Sample | Abs. at 360nm | PL Integrated intensity | Refractive index of solvent (n) | PLQY (%) |
|--------|---------------|-------------------------|---------------------------------|----------|
| RhB    | 0.0246        | 38790.29                | 1.33                            | 31       |
| CQDs   | 0.0265        | 17330.45                | 1.33                            | 12.86    |

**Table S2.** A comparison of fluorescence quantum yields (QY) exhibited by CQDs.

| Quantum dots                                          | QY (%) | References |
|-------------------------------------------------------|--------|------------|
| Ionic liquids modified carbon quantum dots (ILs-CQDs) | 18.13  | [1]        |
| Carbon quantum dots (CQDs)                            | 11.37  | [2]        |
| Carbon quantum dots (CQDs)                            | 16.2   | [3]        |
| Carbon quantum dots (CQDs)                            | 10.36  | [4]        |
| N-doped carbon quantum dots (CQDs)                    | 9      | [5]        |
| Nitrogen doped carbon quantum dots (N-CQDs)           | 12.33  | [6]        |
| Nitrogen doped carbon quantum dot (N-CQDs)            | 14.81  | [7]        |
| Nitrogen doped carbon quantum dot (N-CQDs)            | 9.3    | [8]        |
| Carbon quantum dots (CQDs)                            | 3.5    | [9]        |
| Lotus stem-derived carbon dots (LS-CQDs)              | 0.44   | [10]       |
| Carbon quantum dots (CQDs)                            | 14.12  | [11]       |
| CQDs                                                  | 12.86  | This work  |

**Table S3.** Comparison of the performance of different methods for  $\text{MnO}_4^-$  detection.

| <b>Fluorescent probes</b>                                                                                        | <b>LOD</b>         | <b>References</b> |
|------------------------------------------------------------------------------------------------------------------|--------------------|-------------------|
| ILs-CQDs                                                                                                         | 0.09 $\mu\text{M}$ | [1]               |
| CQDs                                                                                                             | 0.06 $\mu\text{M}$ | [4]               |
| Luminescent lanthanide metal-organic frameworks (Ln-MOFs)                                                        | 3.53 $\mu\text{M}$ | [12]              |
| Red emission carbon dots (RCDs)                                                                                  | 14.5 nM            | [13]              |
| Manganese-doped carbon dots (Mn-CDs)                                                                             | 0.66 $\mu\text{M}$ | [14]              |
| Covalent organic framework (COF)                                                                                 | 0.01 mM            | [15]              |
| [Zn(2,2'-bipy)(ppa)(H <sub>2</sub> O) <sub>2</sub> ] $\cdot$ 2H <sub>2</sub> O                                   | 6.73 $\mu\text{M}$ | [16]              |
| [Co(NPDC)(bpee)] $\cdot$ DMF $\cdot$ 2H <sub>2</sub> O                                                           | 1.50 $\mu\text{M}$ | [17]              |
| {[Eu <sub>2</sub> Na(Hpddb)(pddb) <sub>2</sub> (CH <sub>3</sub> COO) <sub>2</sub> ] $\cdot$ 2.5DMA} <sub>n</sub> | 5.99 $\mu\text{M}$ | [18]              |
| Carbon nanospheres (CNs)                                                                                         | 0.72 $\mu\text{M}$ | [19]              |
| CQDs                                                                                                             | 3.31 $\mu\text{M}$ | This work         |

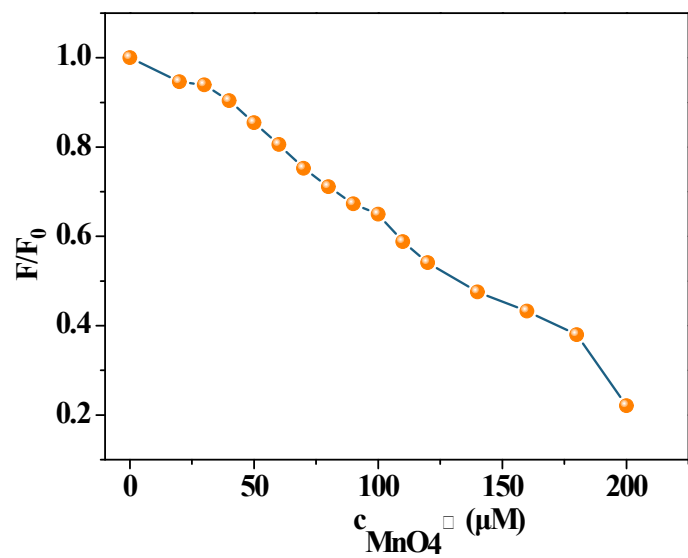

**Fig. S6** Relationship between fluorescence intensity and different  $\text{MnO}_4^-$  concentrations.

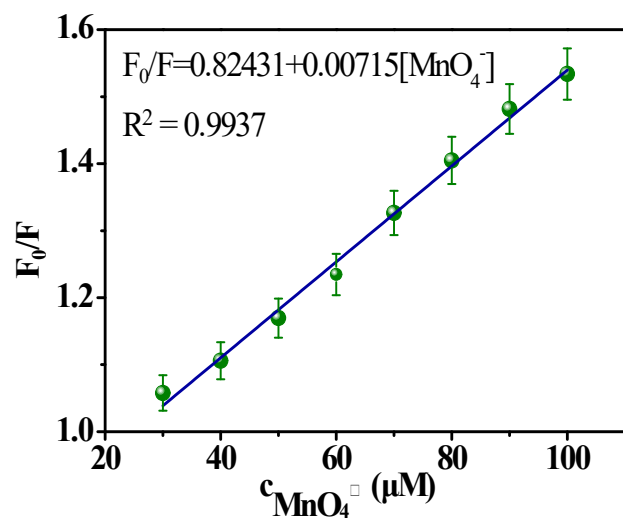

Fig. S7 Linear plots of different concentrations of  $\text{MnO}_4^-$  versus  $F_0/F$ .



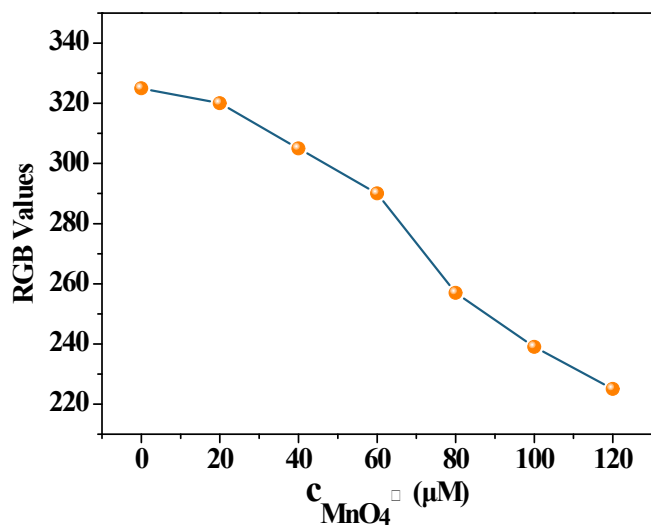

Fig. S8 The relationship between RGB values and  $MnO_4^-$  concentrations

Table S4. Recoveries of  $MnO_4^-$  in water samples based on smartphone sensing platform (n = 3).

| Sample      | Added ( $\mu M$ ) | Found ( $\mu M$ ) | Recovery (%) | RSD (%) |
|-------------|-------------------|-------------------|--------------|---------|
| Tap water   | 0                 | NF                | -            | -       |
|             | 40                | 39.35             | 98.38        | 4.02    |
|             | 70                | 68.34             | 97.63        | 4.94    |
|             | 80                | 82.78             | 103.48       | 3.56    |
| River water | 0                 | NF                | -            | -       |
|             | 40                | 39.76             | 99.40        | 3.69    |
|             | 70                | 68.73             | 98.19        | 4.27    |
|             | 80                | 84.01             | 105.01       | 5.19    |

Note: NF=Not found

## References

- [1] Y. Sun, S. Ma, H. Wang, H. Wang, M. Gao and X. Wang, *Anal. Bioanal. Chem.*, 2023, **415**, 4753-4766.
- [2] P. Surendran, A. Lakshmanan, G. Vinitha and G. Ramalingam, *Luminescence*, 2020, **35**, 196-202.
- [3] X. Hu, Y. Li, Y. Xu, Z. Gan, X. Zou, J. Shi, X. Huang, Z. Li and Y. Li, *Food Chem.*, 2021, **339**, 127775.
- [4] P. Wang, J. Wang, T. Liu, Z. Sun, M. Gao, K. Huang and X. Wang, *Microchem. J.*, 2022, **178**, 107374.
- [5] Z. Zhai, J. Xu, T. Gong, B. Cao, K. Cui, L. Hou and C. Yuan, *Chem. Commun.*, 2022, **140**, 109387.
- [6] S. Ding, P. Tan, J. Wen, T. Li and W. Wang, *Sci. Total Environ.*, 2022, **814**, 152745.
- [7] S. Patel, K. Shrivastava, D. Sinha, I. Karbhari and T. K. Patle, *Spectrochim. Acta A*, 2023, **299**, 122824.
- [8] R. Zhou, C. Chen, J. Hu, X. Liao, H. Hu, Z. Tong, J. Liang and F. Huang, *Ind. Crop. Prod.*, 2022, **188**, 115705.
- [9] S. Ding, Y. Gao, B. Ni and X. Yang, *Inorg. Chem. Commun.*, 2021, **130**, 108636.
- [10] A. Qureshi, A. Pandith, A. Bashir and L. Malik, *Anal. Methods*, 2021, **13**, 4756.
- [11] K. Kasinathan, S. Samayanan, K. Marimuthu and J-H, Yim, *Appl. Surf. Sci.*, 2022, **601**, 154266.
- [12] Z. Yu, H. Zhao, Z. Ling, J. Zhou and X. Zhao, *Inorg Chim Acta.*, 2022, **543**, 121159.
- [13] D. Chang, Z. Zhao, J. Feng, Y. Xin, Y. Yang and L. Shi, *Sensor. Actuat. B-Chem.*, 2021, **349**, 130774.
- [14] X. Chu, G. Ning, Z. Zhou, Y. Liu, Q. Xiao and S. Huang, *Microchim. Acta*, 2020, **187**, 1-11.
- [15] M. Huang, J. Chong, C. Hu and Y. Yang, *Inorg. Chem. Commun.*, 2020, **119**, 108094.
- [16] K. Wang, M. Zhu, S. Ma, X. Li, M. Zhang and E. Gao, *Polyhedron*, 2019, **166**, 60-64.
- [17] F. Li, Y. Hong, K. Zuo, Q. Sun and E. Gao, *J. Solid State Chem.*, 2019, **270**, 509-515.
- [18] S. Xu, J. Shi, B. Ding, Z. Liu, X. Wang, X. Zhao and E. Yang, *Dalton Trans.*, 2019, **48**, 1823-1834.
- [19] X. Dong, M. Wang and Y. Tang, *Spectrochim. Acta A*, 2022, **271**, 120886.
